# Supplementary material for: Methylation of HBP1 by PRMT1 promotes tumor progression by regulating actin cytoskeleton remodeling
Source: PubMed Central journal article supplement (PMC9360041; doi:10.1038/s41389-022-00421-7), 2022-08-08
Supplement: 41389_2022_421_MOESM6_ESM.pdf [file 41389_2022_421_MOESM6_ESM.pdf]

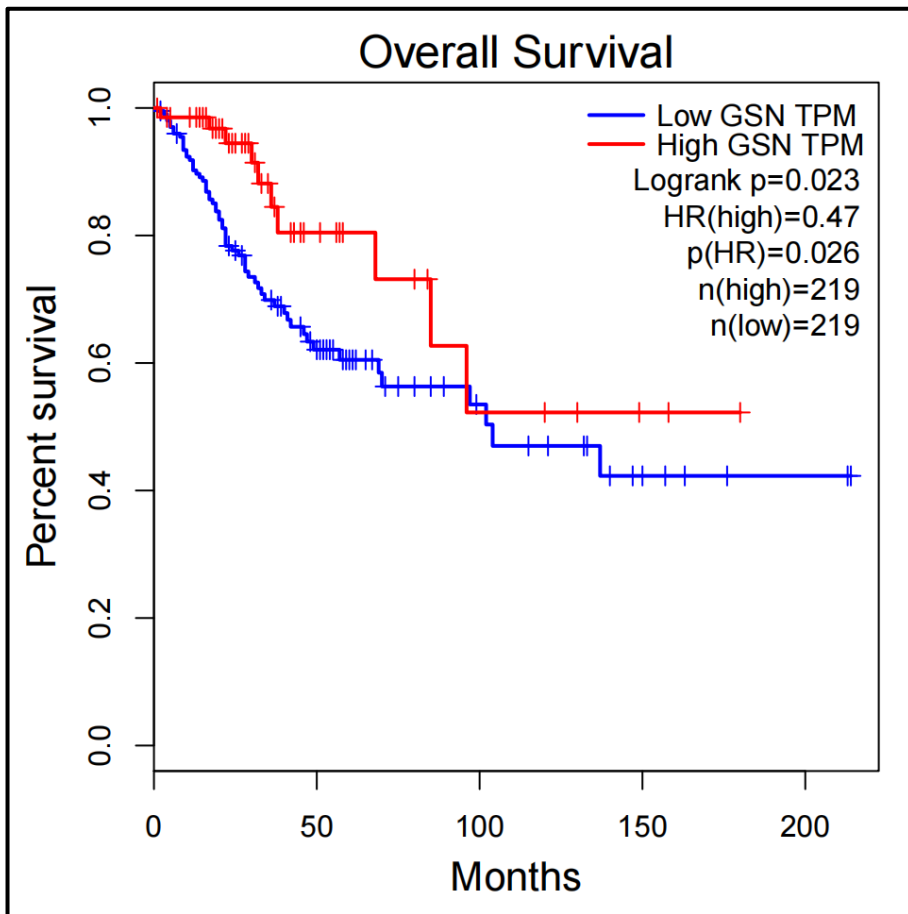

Figure S5
